# Supplementary material for: A new packing motif for para-sulfonatocalix[4]arene: the solid state structure of the para-sulfonatocalix[4]arene d-arginine complex
Source: Royal Society of Chemistry journal article supplement (doi:10.1039/b408863h), 2004-01-01
Supplement: b408863h.pdf [file b408863h.pdf]

**Table 1** Torsion Angles along the Lateral Chains of the Arginine Molecules  
 Residue torsion angles

| Residue  | CHI1            | CHI2    | CHI3   | CHI4   | CHI5    | CHI6    |
|----------|-----------------|---------|--------|--------|---------|---------|
| CH1      | N- CA-CB- CG    |         |        |        |         |         |
| CH2      | CA-CB- CG- CD   |         |        |        |         |         |
| CH3      | CB- CG- CD- NE  |         |        |        |         |         |
| CH4      | CG- CD- NE- CZ  |         |        |        |         |         |
| CH5      | CD- NE- CZ- NH1 |         |        |        |         |         |
| CH6      | CD- NE- CZ- NH2 |         |        |        |         |         |
| Arg 1    | -69.33          | 169.85  | 179.39 | 81.30  | -177.75 | 1.83    |
| Arg 2    | 68.52           | 173.67  | -59.95 | -81.52 | -178.02 | 3.55    |
| Arg 3    | -71.29          | -177.32 | 49.58  | 70.79  | -179.19 | 0.04    |
| Arg 4    | 35.30           | -179.81 | -39.88 | 106.73 | 176.75  | -5.62   |
| Arg 5    | 60.31           | 159.25  | 172.29 | 96.84  | -4.89   | 178.28  |
| Arg 6 D1 | -174.05         | -168.66 | 172.77 | -77.25 | -179.29 | -1.26   |
| Arg 6 D2 | 173.99          | -32.86  | 61.14  | 145.54 | -2.87   | -179.52 |

**Table 2** Sulphonate –Water Hydrogen Bond Distances

| Residue | SO <sup>-</sup> - H <sub>2</sub> O                                        |
|---------|---------------------------------------------------------------------------|
| Calix 1 | 2.86; 2.89; 2.96; 2.84<br>3.06<br>2.75; 2.99<br>2.90; 2.76; 2.96          |
| Calix 2 | 2.65; 2.95-2.97; 2.70-3.04<br>2.72; 2.94; 2.81<br>2.74; 3.17<br>2.58-2.79 |
| Calix 3 | 2.66 2.76 2.75-2.40<br>2.72 2.33-2.64<br>2.94-2.74<br>2.86 2.75           |
| Calix 4 | 2.54 3.04<br>2.81-2.83<br>2.68<br>2.44-2.59                               |

**Table 3** Hydrogen Bond Distances For the Arginine Molecules

| Residue | NH <sub>3</sub> <sup>+</sup> -H <sub>2</sub> O | COO <sup>-</sup> -H <sub>2</sub> O | NH <sub>2</sub> <sup>+</sup> -H <sub>2</sub> O | NH <sub>2</sub> -H <sub>2</sub> O | NH-H <sub>2</sub> O | NH <sub>3</sub> <sup>+</sup> -SO <sup>-</sup> | COO <sup>-</sup> - SO <sup>-</sup> | NH <sub>2</sub> <sup>+</sup> -SO <sup>-</sup> | NH <sub>2</sub> - SO <sup>-</sup> | NH- SO <sup>-</sup> |
|---------|------------------------------------------------|------------------------------------|------------------------------------------------|-----------------------------------|---------------------|-----------------------------------------------|------------------------------------|-----------------------------------------------|-----------------------------------|---------------------|
| Arg 1   | 3.03                                           | 2.60; 2.70                         | -                                              | 3.05                              | -                   | 2.85                                          | -                                  | 3.03; 2.94                                    | 3.02                              | 2.95                |
| Arg 2   | -                                              | 3.03                               | 3.20-3.21                                      | -                                 | 3.01                | 2.84-2.88                                     | 2.73                               | 2.80-2.96                                     | 2.96-3.03                         | 3.26                |
| Arg 3   | 2.56                                           | 3.12                               | -                                              | -                                 | -                   | 2.75                                          | 2.62                               | 2.99                                          | 3.01                              | 2.90                |
| Arg 4   | 3.01                                           | 2.60                               | -                                              | 2.92                              | -                   | 2.81-2.61                                     | 3.41-3.42                          | 2.93                                          | 2.92-2.88                         | 3.09                |
| Arg 5   | 2.7                                            | 2.63; 3.31                         | 3.02                                           | -                                 | 3.14                | 2.86                                          | 3.05                               | 2.91                                          | 2.88-2.72                         | -                   |
